# Supplementary material for: The role of E-cadherin expression in the treatment of western undifferentiated early gastric cancer: Can a biological factor predict lymph node metastasis?
Source: PubMed Central journal article supplement (PMC7190119; doi:10.1371/journal.pone.0232429), 2020-04-29
Supplement: pone.0232429.s001.pdf [file pone.0232429.s001.pdf]

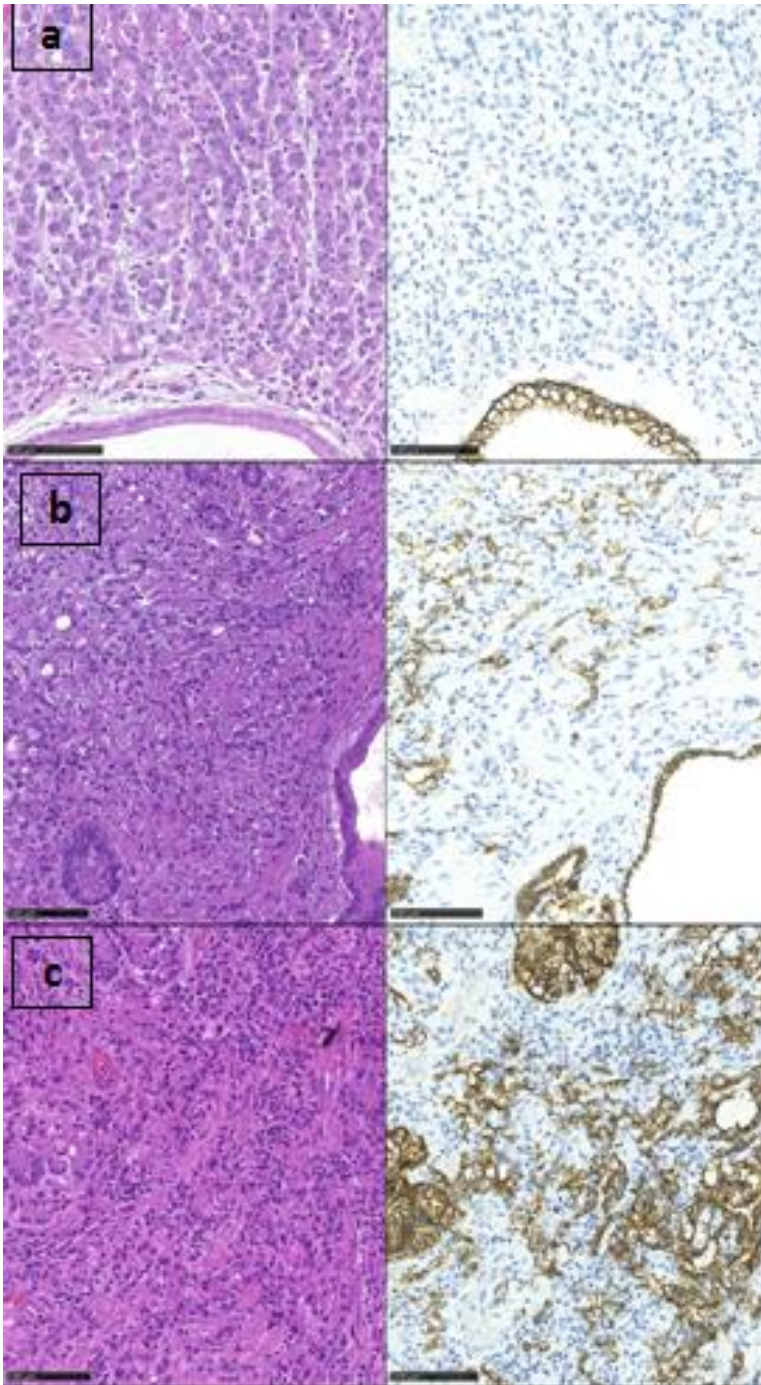

**S1 Fig. The E-cadherin (E-cad) expression by immunohistochemical assays (ICH).**

- a) Absent/low staining, fewer than 10% of tumor cells
- b) Moderate staining in only 10-50% of tumor cells
- c) Strong staining of more than 75% of tumor cells
